# Supplementary material
Source: publisher figshare collection journal article supplement (https://tandf.figshare.com/articles/dataset/_/25452217)
Supplement: Supplementary file 1 [file 2]

## Sheet: 3D-n=500,m=1000,k=125
	2D- r=s=0- g_t=-0.3							2D- r=s=0.8- g_t=-0.3							2D- s=0.8, r=0.3- g_t=-0.3
	g	red_gamma	red_sigma	red_quant				g	red_gamma	red_sigma	red_quant				g	red_gamma	red_sigma	red_quant
1	-0.250	8.93	5.57	22.75				-0.250	22.57	18.88	35.59				-0.250	27.59	15.59	33.35
2	-0.125	9.63	5.75	26.98				-0.125	22.07	19.40	34.10				-0.125	25.02	22.90	39.34
3	0.000	8.50	5.33	26.98				0.000	18.50	17.50	35.85				0.000	20.34	20.13	36.51
4	0.125	6.72	5.30	23.58				0.125	14.35	16.77	29.05				0.125	15.32	18.63	28.82
5	0.250	4.94	4.71	20.47				0.250	10.52	14.83	23.86				0.250	10.84	15.94	23.26
	3D- r=s=0- g_t=-0.3							3D- r=s=0.8- g_t=-0.3							3D- s=0.8, r=0.3- g_t=-0.3
	g	red_gamma	red_sigma	red_quant				g	red_gamma	red_sigma	red_quant				g	red_gamma	red_sigma	red_quant
1	-0.250	18.93	9.07	33.58				-0.250	39.95	26.65	43.91				-0.250	50.6	37.04	56.7
2	-0.125	16.57	9.54	35.52				-0.125	37.09	26.47	51.31				-0.125	45.52	35.4	57.84
3	0.000	12.98	9.43	31.62				0.000	31.89	25.24	46.37				0.000	37.86	32.43	51.04
4	0.125	8.38	8.77	25.14				0.125	25.03	23.35	36.55				0.125	28.01	28.98	37.81
5	0.250	3.04	7.91	15.93				0.250	16.94	21.04	23.11				0.250	16.76	25.15	20.01
	2D- r=s=0- g_t=0.3							2D- r=s=0.8- g_t=0.3							2D- s=0.8, r=0.3- g_t=0.3
	g	red_gamma	red_sigma	red_quant				g	red_gamma	red_sigma	red_quant				g	red_gamma	red_sigma	red_quant
1	-0.250	9.34	5.40	16.84				-0.250	20.41	18.17	26.61				-0.250	24.13	22.61	30.66
2	-0.125	12.57	6.72	23.41				-0.125	25.94	21.24	36.08				-0.125	30.06	25.55	40.86
3	0.000	15.09	7.97	25.30				0.000	29.99	24.04	40.08				0.000	34.23	28.24	45.50
4	0.125	16.68	8.67	31.30				0.125	32.38	25.12	47.06				0.125	36.46	28.81	51.93
5	0.250	17.46	9.19	33.05				0.250	33.39	26	49.23				0.250	37.10	29.23	53.74
	3D- r=s=0- g_t=0.3							3D- r=s=0.8- g_t=0.3							3D- s=0.8, r=0.3- g_t=0.3
	g	red_gamma	red_sigma	red_quant				g	red_gamma	red_sigma	red_quant				g	red_gamma	red_sigma	red_quant
1	-0.250	-5.24	8.12	-20.81				-0.250	-1.45	22.58	-18.13				-0.250	8.68	31.44	-9.29
2	-0.125	13.49	9.92	21.01				-0.125	25.38	26.24	31.9				-0.125	38.57	36.32	42.55
3	0.000	20.01	11.56	31.62				0.000	35.14	29.55	44.64				0.000	45.78	39.70	54.57
4	0.125	22.69	12.33	25.14				0.125	38.86	30.69	53.63				0.125	48.91	40.21	62.52
5	0.250	23.67	12.93	15.93				0.250	40.20	31.64	55.60				0.250	49.55	40.54	63.76
	2D- r=s=0- g_t=0							2D- r=s=0.8- g_t=0							2D- s=0.8, r=0.3- g_t=0
	g	red_gamma	red_sigma	red_quant				g	red_gamma	red_sigma	red_quant				g	red_gamma	red_sigma	red_quant
1	-0.250	10.99	5.01	21.73				-0.250	27.42	20.62	36.15				-0.250	33.82	26.27	41.02
2	-0.125	13.46	5.99	27.50				-0.125	31.07	22.17	43.96				-0.125	37.11	27.56	48.43
3	0.000	15.24	6.79	31.14				0.000	32.92	23.06	48.16				0.000	38.26	27.97	51.98
4	0.125	15.97	7.33	32.63				0.125	33	23.27	49.29				0.125	37.55	27.60	52.47
5	0.250	15.92	7.59	32.75				0.250	31.91	22.91	48.60				0.250	35.69	26.60	51.24
	3D- r=s=0- g_t=0							3D- r=s=0.8- g_t=0							3D- s=0.8, r=0.3- g_t=0
	g	red_gamma	red_sigma	red_quant				g	red_gamma	red_sigma	red_quant				g	red_gamma	red_sigma	red_quant
1	-0.250	11.88	9.19	19.14				-0.250	28.41	26.03	29.97				-0.250	42.09	37.34	42.60
2	-0.125	19.54	10.39	35.02				-0.125	37.24	27.89	49.15				-0.125	49.25	38.81	59
3	0.000	21.76	11.33	39.16				0.000	39.13	28.83	53.45				0.000	49.83	38.95	61.81
4	0.125	22.12	11.89	40.09				0.125	38.67	28.93	53.88				0.125	48.17	38.04	61.29
5	0.250	21.49	12.01	39.67				0.250	36.88	28.34	52.75				0.250	45.14	36.37	59.33

## Sheet: normal-n=500,m=1000,k=125
	2D- r=s=0.5- g_t=-0.3
	g	red_gamma	red_sigma	red_quant
1	-0.250	-12.08	-7.24	-15.27
2	-0.125	-12.9	-7.38	-18.98
3	0.000	-12.24	-6.98	-20.44
4	0.125	-11.32	-6.39	-21.08
5	0.250	-10.42	-5.76	-21.22
	3D- r=s=0.5- g_t=-0.3
	g	red_gamma	red_sigma	red_quant
1	-0.250	-11.55	-5.8	-12
2	-0.125	-12.31	-4.54	-16.04
3	0.000	-13.41	-3.65	-21.19
4	0.125	-14.71	-3.35	-26.66
5	0.250	-16.11	-2.97	-33.04
	2D- r=s=0.5- g_t=0.3
	g	red_gamma	red_sigma	red_quant
1	-0.250	-5.63	-3.91	-2.01
2	-0.125	-5.62	-3.77	-2.48
3	0.000	-4.98	-3.31	-2.37
4	0.125	-4.28	-2.76	-2.16
5	0.250	-3.67	-2.23	-1.91
	3D- r=s=0.5- g_t=0.3
	g	red_gamma	red_sigma	red_quant
1	-0.250	-22.17	-5.76	-30.98
2	-0.125	-13.83	-6.23	-15.76
3	0.000	-10.62	-5.99	-13.48
4	0.125	-9.32	-6.11	-9.3
5	0.250	-8.81	-5.84	-9.09
	2D- r=s=0.5- g_t=0
	g	red_gamma	red_sigma	red_quant
1	-0.250	-8.96	-6.72	-5.03
2	-0.125	-9.44	-6.83	-6.51
3	0.000	-8.85	-6.45	-6.95
4	0.125	-8.1	-5.9	-7.12
5	0.250	-7.39	-5.31	-7.14
	3D- r=s=0.5- g_t=0
	g	red_gamma	red_sigma	red_quant
1	-0.250	-17.16	-7.76	-14.47
2	-0.125	-11.74	-7.99	-7.96
3	0.000	-9.97	-7.65	-6.89
4	0.125	-9.57	-7.09	-7.64
5	0.250	-9.78	-6.47	-9.14

## Sheet: Figure_2
	R(1,1)=0.59, n<m
	-0.3	-0.2	-0.1	0	0.1	0.2	0.3
g=-0.25	9.8	11.9	12.1	11.8	11.3	10.5	9.6
g=-0.125	10.2	13.2	14.1	14.3	14.1	13.7	13
g=0	9.7	12.9	14.7	15.9	16	15.9	15.6
g=0.125	6.8	11.6	14.2	15.8	16.7	17.1	17.2
g=0.25	4.8	10	13.1	15.2	16.6	17.5	17.9
	R(1,1)=0.59, n>m
	-0.3	-0.2	-0.1	0	0.1	0.2	0.3
g=-0.25	7.7	8.6	7.3	6.7	6.1	5.4	4.7
g=-0.125	7.4	9	8.3	8.2	7.8	7.3	6.8
g=0	6.2	7.6	8.4	8.5	8.1	8.5	8.7
g=0.125	4.6	7.1	7.8	8.6	8.9	9	8.9
g=0.25	3.3	5.9	7.1	8.1	8.7	9.1	9.2
	R(1,1)=0.59, n=m	R(1,1)=0.59, n=m
	-0.3	-0.2	-0.1	0	0.1	0.2	0.3
g=-0.25	9.7	12.3	12.1	10.8	9.9	8.9	7.9
g=-0.125	9.5	12.9	13.6	13	12.6	11.9	11
g=0	9.3	11.8	13.3	13.9	14.1	13.9	13.3
g=0.125	6.1	10.5	12.7	14.1	14.6	14.7	14.6
g=0.25	4.5	8.9	11.5	13.6	14.4	14.9	15.1

## Sheet: Figure_3
	2d			3d				2d			3d
	n=500,m=1000			n=500,m=1000				n=1000,m=1000			n=1000,m=1000
	q1	q2		q1	q2			q1	q2		q1	q2
-0.3	13.27	28.73	-0.3	-4.2	34.64		-0.3	11.44	20.82	-0.3	-0.86	24.93
-0.2	11.95	31.34	-0.2	14.38	40		-0.2	10.34	23.41	-0.2	11.8	29.21
-0.1	12.32	31.89	-0.1	19.8	40.87		-0.1	10.26	23.26	-0.1	15.73	29.68
0	13.72	31.28	0	21.18	38.99		0	14.87	24.17	0	19.73	29.56
0.1	14.44	30.78	0.1	22.06	39.86		0.1	11	21.37	0.1	16.44	27.95
0.2	15.36	30.02	0.2	21.57	38.69		0.2	11.15	20.32	0.2	15.45	26.46
0.3	18.04	30.64	0.3	22.8	38.65		0.3	16.02	22.4	0.3	19.45	28.18
